# Supplementary material for: CSR Communication Matters! An Examination of CSR, Organisational Pride, and Task-Related Pro-Environmental Behaviour Nexus
Source: MDPI journal article supplement (doi:10.3390/su15129665), 2023-06-16
Supplement: s1 [file s1]

Archive with 1 entries (1 files):
- sustainability-2310521-supplementary.pdf
