# Supplementary material for: CSR Communication Matters! An Examination of CSR, Organisational Pride, and Task-Related Pro-Environmental Behaviour Nexus
Source: MDPI journal article supplement (doi:10.3390/su15129665), 2023-06-16
Supplement: s1 [file s1 › sustainability-2310521-supplementary.pdf]

### **Corporate Social Responsibility**

| 2. Please rate the following statements concerning your organization policies and actions for social well-being of all concerned and environment | Hardly Ever              | Sometimes Often          | Very Often               | Often                    | All of the Time          |
|--------------------------------------------------------------------------------------------------------------------------------------------------|--------------------------|--------------------------|--------------------------|--------------------------|--------------------------|
| a. Contributing to the well-being of employees is a high priority at my organization.                                                            | <input type="checkbox"/> |
| b. Contributing to the well-being of customers is a high priority at my organization.                                                            | <input type="checkbox"/> |
| c. Contributing to the well-being of suppliers is a high priority at my organization.                                                            | <input type="checkbox"/> |
| d. Contributing to the well-being of the community is a high priority at my organization.                                                        | <input type="checkbox"/> |
| e. Environmental issues are integral to the strategy of my organization.                                                                         | <input type="checkbox"/> |
| f. Addressing environmental issues is integral to the daily operations of my organization.                                                       | <input type="checkbox"/> |
| g. My organization takes great care that our work does not hurt the environment.                                                                 | <input type="checkbox"/> |
| h. My organization achieves its short-term goals while staying focused on its impact on the environment.                                         | <input type="checkbox"/> |

### **Organization Pride**

| 2. Please rate the following statements regarding your attachment with the organization to show the level of agreement or disagreement | Strongly Disagree        | Disagree                 | Neutral                  | Agree                    | Strongly Agree           |
|----------------------------------------------------------------------------------------------------------------------------------------|--------------------------|--------------------------|--------------------------|--------------------------|--------------------------|
| a. I feel proud to work for my company that cares for well-being of people                                                             | <input type="checkbox"/> |
| b. I feel proud to contribute to my company's success.                                                                                 | <input type="checkbox"/> |
| c. I feel proud to tell others for which company I am working.                                                                         | <input type="checkbox"/> |
| d. It is important for me to work for a company that contributes to the betterment of the world                                        | <input type="checkbox"/> |
| e. I am thinking about quitting my job.                                                                                                | <input type="checkbox"/> |

|                                                                                                |                          |                          |                          |                          |                          |
|------------------------------------------------------------------------------------------------|--------------------------|--------------------------|--------------------------|--------------------------|--------------------------|
| f. I am starting to ask my friends/contacts about other job possibilities.                     | <input type="checkbox"/> |
| g. I intend to leave this company within the next six months.                                  | <input type="checkbox"/> |
| h. I often look to see if positions in other firms are open.                                   | <input type="checkbox"/> |
| <b>3. Please rate the following statements concerning your feelings for your organization.</b> | <b>Very Week</b>         | <b>Week</b>              | <b>Probably No</b>       | <b>Strong</b>            | <b>Very Strong</b>       |
| a. When someone criticizes the company, it feels like a personal insult.                       | <input type="checkbox"/> |
| b. I am very interested in what others think about the company.                                | <input type="checkbox"/> |
| c. When I talk about the company, I usually say 'we' rather than 'they'.                       | <input type="checkbox"/> |
| d. This company's successes are my successes.                                                  | <input type="checkbox"/> |
| e. When someone praises the company, it feels like a personal compliment.                      | <input type="checkbox"/> |
| f. If a story in the media criticized the company, I would feel embarrassed.                   | <input type="checkbox"/> |

### **Communication**

|                                                                                                                                                        |                          |                          |                          |                          |                                     |
|--------------------------------------------------------------------------------------------------------------------------------------------------------|--------------------------|--------------------------|--------------------------|--------------------------|-------------------------------------|
| <b>2. Please rate the following statements regarding your organization to show the level of agreement or disagreement</b>                              | <b>Strongly Disagree</b> | <b>Disagree</b>          | <b>Neutral</b>           | <b>Agree</b>             | <b>Strongly Agree</b>               |
| a. I work for a company that believes that making a profit goes hand in hand with treating all of our key stake holders well                           | <input type="checkbox"/>            |
| b. The current communication channel in place in my department notifies employees of changes in the department/organization about CSR                  | <input type="checkbox"/> | <input type="checkbox"/> | <input type="checkbox"/> | <input type="checkbox"/> | <input checked="" type="checkbox"/> |
| c. Employees at my organization are notified in a timely matter with much detail when changes are taking place related to CSR                          | <input type="checkbox"/>            |
| d. The current methods of feedback from employees at my company are effective in assessing needs for changing communication methods in relation to CSR | <input type="checkbox"/>            |

|                                                                                                           |                          |                          |                          |                          |                          |
|-----------------------------------------------------------------------------------------------------------|--------------------------|--------------------------|--------------------------|--------------------------|--------------------------|
| e. Communication barriers exist in my Bank related to CSR                                                 | <input type="checkbox"/> |
| f. Communication barriers at my Bank could be addressed by analyzing employee feedback regarding CSR      | <input type="checkbox"/> |
| g. Department heads have their own internal communication system with employees regarding CSR initiatives | <input type="checkbox"/> |
| h. My Bank is concerned about improving CSR communication with employees                                  | <input type="checkbox"/> |
| i. My Bank analyzes all employee feedback about CSR                                                       | <input type="checkbox"/> |
| j. Employee job satisfaction is higher when employees feel involved in CSR communication                  | <input type="checkbox"/> |
| k. Poor internal communication is a source for lack of knowledge about CSR activities for employees       | <input type="checkbox"/> |

#### **Task Pro-Environmental Behaviour**

| <b>2. Please rate the following statements regarding your organization to show the level of agreement or disagreement</b> | <b>Strongly Disagree</b> | <b>Disagree</b>          | <b>Neutral</b>           | <b>Agree</b>             | <b>Strongly Agree</b>    |
|---------------------------------------------------------------------------------------------------------------------------|--------------------------|--------------------------|--------------------------|--------------------------|--------------------------|
| a. I adequately complete assigned duties in environmentally friendly ways                                                 | <input type="checkbox"/> |
| b. I fulfilled responsibilities specified in my job description<br>in environmentally-friendly ways                       | <input type="checkbox"/> |
| c. I performed tasks that are expected of me in environmentally-friendly ways                                             | <input type="checkbox"/> |
